# Supplementary material for: Development of Binder Free Interconnected 3D Flower of NiZn2O4 as an Advanced Electrode Materials for Supercapacitor Applications
Source: MDPI journal article supplement (doi:10.3390/cryst12010014), 2021-12-22
Supplement: s1 [file s1]

## Electronic Supplementary Information

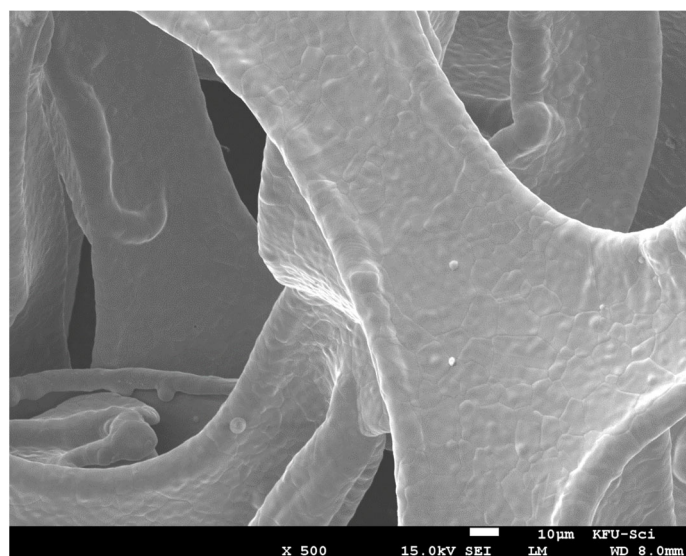

**Figure S1.** Scanning Electron Microscopy images of the bare nickel foam.

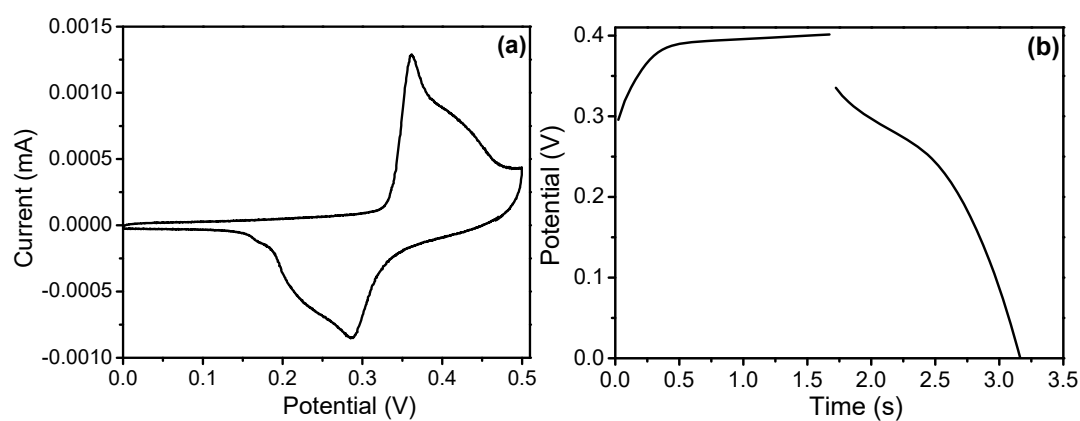

**Figure S2.** (a) CV and (b) CD profile of the bare nickel foam.
